# Supplementary material for: Evidence for Population-Specific Positive Selection on Immune Genes of Anopheles gambiae
Source: PubMed Central journal article supplement (PMC3516473; doi:10.1534/g3.112.004473), 2012-12-01
Supplement: supp_2.12.1505_004473SI.pdf [file supp_2.12.1505_004473SI.pdf]

**Table S1 Mosquito population assignment, molecular form, and 2La karyotype.**

Table S1 is available for download as a Microsoft Excel spreadsheet at

<http://www.g3journal.org/lookup/suppl/doi:10.1534/g3.112.004473/-/DC1>.

Each row in the spreadsheet corresponds to an individual mosquito. Columns indicate mosquito identifier, the malaria transmission season in which the mosquito was collected, the molecular form (see Methods), and karyotype of the 2La chromosomal inversion (see Methods).

**Table S2 Fragment and PCR Oligo information.**

| Identifier | Gene      | PCR      |                             | Fragment Length              | Year Sampled |               |
|------------|-----------|----------|-----------------------------|------------------------------|--------------|---------------|
|            |           | fragment | Forward oligo               |                              |              | Reverse oligo |
| AGAP005681 | GPRNNA21  | AmS010b  | 5'-GCATCATCATCGGTCACCG-3'   | 5'-CTGAGTCACCTGCAAACCG-3'    | 528          | 2007          |
| AGAP005693 | APL2      | AmS011b  | 5'-CTATCCACCGTCCAGTTTG-3'   | 5'-GGTTCGGTGGAAATTCTAACC-3'  | 561          | 2007          |
| AGAP005716 | SCRB16    | AmS013a  | 5'-TGCCGAAGATGAAACGTACG-3'  | 5'-CGTGCTAAAGATTGTCATCCG-3'  | 534          | 2007          |
| AGAP005728 | 5728      | AmS048b  | 5'-GAATTGCGCAAACAGTCCAG-3'  | 5'-CACGTTGCATATCTCGCTGA-3'   | 650          | 2007          |
| AGAP005762 | 5762      | AmS049b  | 5'-ATCGATGTCCTCGGCACTAC-3'  | 5'-GATGGTCAAAGCCAACGAAC-3'   | 525          | 2007          |
| AGAP006102 | PRS1      | AmS052b  | 5'-CGAAAGTGATTCCGGACAAG-3'  | 5'-TTATCGCTCGCACAGCAC-3'     | 304          | 2007          |
| AGAP006348 | LRIM1     | AmS059e  | 5'-CCTCGTACCGCTTGACGAT-3'   | 5'-GTGACCTGGATCAGTCTGC-3'    | 576          | 2007          |
| AGAP006421 | IRSP1     | AmS053a  | 5'-ATGGCCATCTGGATAGCTTG-3'  | 5'-GATATTCGCTCCACCAGCTC-3'   | 563          | 2007          |
| AGAP006974 | TOLL9     | AmS001b  | 5'-GCATCTCGAACTGACACCAG-3'  | 5'-TTCGGATATTCCGGAGGAG-3'    | 536          | 2007          |
| AGAP007030 | LRR(7030) | AmS002a  | 5'-AGAAACAACAGTCGCAAGCTC-3' | 5'-ACATGCTGTGCACCATAAAGAA-3' | 501          | 2007          |
| AGAP007032 | 7032      | AmS046a  | 5'-CGAAAGCAGCAGAAGAATCG-3'  | 5'-TGCTGCATCGTTGTGCACG-3'    | 601          | 2007          |
| AGAP007033 | APL1C     | AmS003a  | 5'-CTTCTGAATAGTGTGCGGTAA-3' | 5'-TGAGACAAACTTTGGAGGTCAG-3' | 371          | 2007          |
| AGAP007034 | LRR(7034) | AmS047b  | 5'-CACAGATGCTCCAGCTTCG-3'   | 5'-CGTACTTGGTGGACCAACG-3'    | 738          | 2007          |
| AGAP007035 | APL1B     | AmS036a  | 5'-AGATGGGTCTGTGTTGCTG-3'   | 5'-CGCACACCATTGATGTGGG-3'    | 833          | 2007-2008     |
| AGAP007036 | APL1A     | AmS037d  | 5'-TGTGATTTAYMCAACTCATGC-3' | 5'-TCAAAGTGCTCGATYTGTCG-3'   | 802          | 2007          |
| AGAP007037 | LRR(7037) | AmS038a  | 5'-CGTTGTCCAGTATCCACAG-3'   | 5'-CAACAACACGATCAAGCAGC-3'   | 580          | 2007          |
| AGAP007041 | FBN32     | AmS004b  | 5'-GTACGATGGTACGGTCGATTC-3' | 5'-GGTAGGAATGCTTCCGATTAG-3'  | 486          | 2007-2008     |

Table S2: Continued

| Identifier | Gene              | PCR      |                             | Reverse oligo                | Fragment Length | Year Sampled |
|------------|-------------------|----------|-----------------------------|------------------------------|-----------------|--------------|
|            |                   | fragment | Forward oligo               |                              |                 |              |
| AGAP007048 | LRR(7048)         | AmS005b  | 5'-TTTTTAAGCCTAGCCCGTCTG-3' | 5'-CAGCTCGGTAAGCCGATTG-3'    | 491             | 2007-2008    |
| AGAP007058 | DLL               | AmS007b  | 5'-GTACGTAGCCACCCATCTG-3'   | 5'-GTTAAGATCTGGTTTCAAATCG-3' | 641             | 2007-2008    |
| AGAP007059 | LRR(7059)         | AmS051b  | 5'-ACCAGGCGCTAGTTCTTTGA-3'  | 5'-TACCGCAACGGTCTTTAAC-3'    | 641             | 2007-2008    |
| AGAP007060 | LRR(7060)         | AmS006b  | 5'-AGTAGCAGGCTCGTGAGTGAG-3' | 5'-GAAGCACTTCCACTGGTGCT-3'   | 658             | 2007-2008    |
| AGAP007061 | LRR(7061)         | AmS045b  | 5'-AGGAAAGATCAAGCAGCTCG-3'  | 5'-CTGGCGATCGTCAACAACG-3'    | 532             | 2007         |
| H603flank  | intergenic region | AmS050a  | 5'-CAAGGCAGCTTCTTCGTTCT-3'  | 5'-GTTACAGAGTTTGGTCTTGC-3'   | 522             | 2007-2008    |
| AGAP001826 | APOII/I           | AmS056a  | 5'-CCGTTGACGTGGTACTTGG-3'   | 5'-ATGTGGCTGCCGATTTCTAC-3'   | 566             | 2007         |
| AGAP002593 | APOD              | AmS057c  | 5'-GGTACGATCAACACTTCGAG-3'  | 5'-TGATGCGCATATCCTGTCG-3'    | 490             | 2007         |
| AGAP010815 | TEP1              | AmS054c  | 5'-CGTATTTGGACGTCCGACG-3'   | 5'-CCATGCAATCAATGAGAACG-3'   | 579             | 2007         |
| AGAP012352 | AgMDL1            | AmS055b  | 5'-CAGCAGGATTCAGTTCTC-3'    | 5'-ATCCATGAGGTTTCGATCTC-3'   | 486             | 2007         |
| AGAP001081 | WASP              | AmS058b  | 5'-TTCGTCTCGGTAGCAAAG-3'    | 5'-TGGTGCAGCTGTACACGAC-3'    | 440             | 2007         |

**Table S3** Sequenced fragment physical genomic locations

| Identifier | Gene Name  | Chromosome | Chromosomal           |             | Chromosomal Strand |
|------------|------------|------------|-----------------------|-------------|--------------------|
|            |            |            | Location <sup>a</sup> | Inside PRI? |                    |
| AGAP005681 | GPRNNA21   | 2L         | 18693376              | Yes         | -                  |
| AGAP005693 | APL2       | 2L         | 18785249              | Yes         | +                  |
| AGAP005716 | SCRB16     | 2L         | 19542880              | Yes         | +                  |
| AGAP005728 | 5728       | 2L         | 19769635              | Yes         | -                  |
| AGAP005762 | 5762       | 2L         | 20339460              | Yes         | -                  |
| AGAP006102 | PRS1       | 2L         | 26685850              | No          | +                  |
| AGAP006348 | LRIM1      | 2L         | 30329656              | No          | -                  |
| AGAP006421 | IRSP1      | 2L         | 31693742              | No          | +                  |
| AGAP006974 | TOLL9      | 2L         | 40434581              | Yes         | -                  |
| AGAP007030 | LRR(7030)  | 2L         | 41057548              | Yes         | -                  |
| AGAP007032 | 7032       | 2L         | 41245076              | Yes         | +                  |
| AGAP007033 | APL1C      | 2L         | 41257877              | Yes         | -                  |
| AGAP007034 | LRR(7034)  | 2L         | 41262272              | Yes         | -                  |
| AGAP007035 | APL1B      | 2L         | 41266619              | Yes         | -                  |
| AGAP007036 | APL1A      | 2L         | 41271509              | Yes         | -                  |
| AGAP007037 | LRR(7037)  | 2L         | 41274607              | Yes         | -                  |
| AGAP007041 | FBN32      | 2L         | 41381834              | Yes         | +                  |
| AGAP007048 | LRR(7048)  | 2L         | 41648960              | Yes         | +                  |
| AGAP007058 | Distalless | 2L         | 42005592              | Yes         | -                  |
| AGAP007059 | LRR(7059)  | 2L         | 42005592              | Yes         | +                  |
| AGAP007060 | LRR(7060)  | 2L         | 42062331              | Yes         | -                  |
| AGAP007061 | LRR(7061)  | 2L         | 42067616              | Yes         | -                  |
|            | intergenic |            |                       |             |                    |
| H603flank  | region     | 2L         | 42071847              | Yes         | -                  |
| AGAP001826 | APOII/I    | 2R         | 11201968              | No          | -                  |
| AGAP002593 | APOD       | 2R         | 40909880              | No          | -                  |
| AGAP010815 | TEP1       | 3L         | 11117128              | No          | -                  |
| AGAP012352 | AgMDL1     | 3L         | 23677600              | No          | +                  |
| AGAP001081 | WASP       | X          | 23372448              | No          | -                  |

<sup>a</sup> Gene starting positions on chromosome 2 given according to locations in *A. gambiae* PEST genome sequence, which corresponds to the inverted 2La+ form of the 2La inversion.

**Table S4 Population genetic summary statistics for all genes in each population.**

| Locus                | Identifier | $n^a$ | $S_{syn}^b$ | $D^c$   | $H^d$   | $EW^e$ | $HEW^f$ |
|----------------------|------------|-------|-------------|---------|---------|--------|---------|
| M form               |            |       |             |         |         |        |         |
| <i>Toll9</i>         | AGAP006974 | 64    | 79          | -0.6612 | -0.3681 | 0.019  | 1       |
| <i>LRR(7030)</i>     | AGAP007030 | 64    | 34          | -0.7755 | -0.8827 | 0.062  | 0.0921  |
| <i>APL1C</i>         | AGAP007033 | 64    | 21          | -0.546  | -1.1648 | 0.2739 | 0.084   |
| <i>FBN32</i>         | AGAP007041 | 100   | 33          | -1.0852 | -0.7677 | 0.0864 | 0.0992  |
| <i>LRR(7048)</i>     | AGAP007048 | 100   | 68          | -2.0115 | -0.1663 | 0.046  | 0.1441  |
| <i>LRR(7060)</i>     | AGAP007060 | 100   | 42          | -1.6659 | 0.084   | 0.0842 | 0.2152  |
| <i>DLL</i>           | AGAP007058 | 100   | 87          | -2.0234 | -0.6157 | 0.0208 | 0.1036  |
| <i>GPRNNA21</i>      | AGAP005681 | 64    | 16          | -0.7143 | 0.1597  | 0.1201 | 0.2411  |
| <i>APL2</i>          | AGAP005693 | 64    | 27          | -1.0359 | 0.6826  | 0.0459 | 0.7155  |
| <i>SCRB16</i>        | AGAP005716 | 64    | 47          | -0.3479 | -0.3037 | 0.0347 | 0.1326  |
| <i>APL1B</i>         | AGAP007035 | 100   | 88          | -0.5362 | -1.7003 | 0.0898 | 0.0294  |
| <i>APL1A</i>         | AGAP007036 | 62    | 110         | -1.15   | -2.5176 | 0.3002 | 0.014   |
| <i>LRR(7037)</i>     | AGAP007037 | 64    | 13          | -1.682  | -0.2348 | 0.5239 | 0.1441  |
| <i>LRR(7061)</i>     | AGAP007061 | 64    | 37          | -0.8415 | 0.1359  | 0.0605 | 0.2283  |
| <i>7032</i>          | AGAP007032 | 64    | 73          | -1.4061 | 0.5115  | 0.0181 | 1       |
| <i>LRR(7034)</i>     | AGAP007034 | 62    | 20          | 0.174   | 0.7383  | 0.1623 | 0.779   |
| <i>5758</i>          | AGAP005758 | 64    | 29          | -1.5625 | -0.1749 | 0.0815 | 0.1441  |
| <i>5762</i>          | AGAP005762 | 64    | 73          | -1.6686 | -0.2999 | 0.02   | 0.1326  |
| <i>H603 flanking</i> | AGAP007058 | 100   | 54          | -1.866  | -0.4372 | 0.023  | 0.1326  |
| <i>LRR(7059)</i>     | AGAP007059 | 100   | 50          | -1.8131 | -1.6246 | 0.148  | 0.0302  |
| <i>PRS1</i>          | AGAP006102 | 64    | 16          | -1.6028 | -0.1924 | 0.1709 | 0.1441  |
| <i>IRSP1</i>         | AGAP006421 | 64    | 55          | -1.4194 | -2.4365 | 0.0557 | 0.014   |
| <i>TEP1</i>          | AGAP010815 | 64    | 10          | -2.1817 | -2.0996 | 0.7979 | 0.0233  |
| <i>AgMDL2</i>        | AGAP012352 | 64    | 66          | -1.7729 | 0.0863  | 0.0249 | 0.2667  |
| <i>APOII-I</i>       | AGAP001826 | 64    | 23          | -1.5496 | -0.2477 | 0.1338 | 0.1441  |
| <i>APOD</i>          | AGAP002593 | 64    | 37          | -0.8402 | -0.9231 | 0.0454 | 0.4199  |
| <i>WASP</i>          | AGAP001081 | 64    | 42          | -1.6375 | -0.3393 | 0.0322 | 0.1326  |
| <i>LRIM1</i>         | AGAP006348 | 64    | 25          | -0.1096 | -2.4951 | 0.1221 | 0.0336  |
| S form               |            |       |             |         |         |        |         |
| <i>Toll9</i>         | AGAP006974 | 100   | 81          | -0.6536 | -0.4918 | 0.0118 | 0.1352  |
| <i>LRR(7030)</i>     | AGAP007030 | 100   | 59          | -1.1477 | -1.1961 | 0.0378 | 0.091   |
| <i>APL1C</i>         | AGAP007033 | 100   | 72          | -1.3893 | -0.885  | 0.126  | 0.0928  |
| <i>FBN32</i>         | AGAP007041 | 100   | 47          | -1.7597 | -0.7475 | 0.0454 | 0.1117  |
| <i>LRR(7048)</i>     | AGAP007048 | 100   | 79          | -2.2608 | -0.1704 | 0.0364 | 0.1473  |

|                      |            |     |     |         |         |        |        |
|----------------------|------------|-----|-----|---------|---------|--------|--------|
| <i>LRR(7060)</i>     | AGAP007060 | 100 | 50  | -2.0471 | -1.4173 | 0.0684 | 0.091  |
| <i>DLL</i>           | AGAP007058 | 100 | 96  | -1.9502 | -1.2775 | 0.0146 | 0.091  |
| <i>GPRNNA21</i>      | AGAP005681 | 100 | 28  | -1.7265 | -0.4675 | 0.1156 | 0.1473 |
| <i>APL2</i>          | AGAP005693 | 100 | 43  | -1.7926 | 0.4499  | 0.0434 | 0.3721 |
| <i>SCRB16</i>        | AGAP005716 | 100 | 58  | -0.7949 | -0.4554 | 0.026  | 0.1352 |
| <i>APL1B</i>         | AGAP007035 | 100 | 120 | -0.7912 | -1.5837 | 0.0172 | 0.091  |
| <i>APL1A</i>         | AGAP007036 | 100 | 147 | -0.061  | -1.4618 | 0.0158 | 0.1352 |
| <i>LRR(7037)</i>     | AGAP007037 | 100 | 49  | -2.0094 | -0.0114 | 0.0688 | 0.1535 |
| <i>LRR(7061)</i>     | AGAP007061 | 100 | 33  | -0.9212 | -0.1171 | 0.0894 | 0.1473 |
| <i>7032</i>          | AGAP007032 | 100 | 83  | -1.7822 | 0.2356  | 0.0154 | 0.2135 |
| <i>LRR(7034)</i>     | AGAP007034 | 100 | 42  | -1.9241 | -0.099  | 0.0598 | 0.1473 |
| <i>5758</i>          | AGAP005758 | 100 | 37  | -1.7718 | -0.1192 | 0.0642 | 0.1473 |
| <i>5762</i>          | AGAP005762 | 100 | 100 | -1.564  | 0.0407  | 0.0122 | 0.1535 |
| <i>H603 flanking</i> | AGAP007058 | 100 | 83  | -2.2543 | -0.1461 | 0.0202 | 0.1473 |
| <i>LRR(7059)</i>     | AGAP007059 | 100 | 51  | -0.986  | -0.2439 | 0.042  | 0.1473 |
| <i>PRS1</i>          | AGAP006102 | 100 | 17  | -1.4331 | -0.2205 | 0.1842 | 0.1473 |
| <i>IRSP1</i>         | AGAP006421 | 100 | 61  | -0.8321 | -0.9617 | 0.017  | 0.0928 |
| <i>TEP1</i>          | AGAP010815 | 100 | 15  | 0.317   | 0.565   | 0.2096 | 0.5221 |
| <i>AgMDL2</i>        | AGAP012352 | 100 | 68  | -1.4512 | 0.4507  | 0.0198 | 0.3682 |
| <i>APOII-I</i>       | AGAP001826 | 100 | 44  | -2.0695 | 0.1091  | 0.0598 | 0.1926 |
| <i>APOD</i>          | AGAP002593 | 100 | 53  | -1.819  | -0.9022 | 0.065  | 0.0928 |
| <i>WASP</i>          | AGAP001081 | 100 | 77  | -2.2284 | -0.1177 | 0.0432 | 0.1473 |
| <i>LRIM1</i>         | AGAP006348 | 100 | 47  | -0.5435 | -0.0234 | 0.0228 | 0.1535 |

---

GOUNDRY

$2\text{La}^+/2\text{La}^+$

|                  |            |     |    |         |         |        |        |
|------------------|------------|-----|----|---------|---------|--------|--------|
| <i>ToII9</i>     | AGAP006974 | 100 | 50 | -0.1716 | -3.0625 | 0.0868 | 0.0224 |
| <i>LRR(7030)</i> | AGAP007030 | 100 | 23 | -0.1144 | 0.5018  | 0.059  | 0.5892 |
| <i>APL1C</i>     | AGAP007033 | 100 | 22 | -0.1767 | -1.6356 | 0.2556 | 0.0999 |
| <i>FBN32</i>     | AGAP007041 | 100 | 23 | 0.2029  | 0.3183  | 0.2676 | 0.425  |
| <i>LRR(7048)</i> | AGAP007048 | 100 | 14 | 1.5159  | -0.1189 | 0.1616 | 0.3041 |
| <i>LRR(7060)</i> | AGAP007060 | 100 | 10 | 0.0003  | -0.5047 | 0.3704 | 0.425  |
| <i>DLL</i>       | AGAP007058 | 100 | 16 | 0.9977  | -0.2242 | 0.211  | 0.3027 |
| <i>GPRNNA21</i>  | AGAP005681 | 100 | 11 | -0.4812 | 0.0792  | 0.365  | 0.3683 |
| <i>APL2</i>      | AGAP005693 | 100 | 13 | -1.0815 | -0.5745 | 0.3712 | 0.2448 |
| <i>SCRB16</i>    | AGAP005716 | 100 | 21 | 1.0104  | -1.0902 | 0.1456 | 0.2402 |
| <i>APL1B</i>     | AGAP007035 | 100 | 70 | 0.7992  | -2.3727 | 0.336  | 0.0999 |
| <i>APL1A</i>     | AGAP007036 | 100 | 63 | 2.4401  | -1.8712 | 0.1678 | 0.7745 |
| <i>LRR(7037)</i> | AGAP007037 | 100 | 8  | 0.3655  | 0.6926  | 0.2866 | 0.7745 |

---

|                                        |            |     |    |         |         |        |        |
|----------------------------------------|------------|-----|----|---------|---------|--------|--------|
| <i>LRR(7061)</i>                       | AGAP007061 | 100 | 8  | 2.4058  | 0.072   | 0.418  | 0.425  |
| <i>7032</i>                            | AGAP007032 | 100 | 19 | 1.1648  | -3.0339 | 0.328  | 0.2402 |
| <i>LRR(7034)</i>                       | AGAP007034 | 100 | 6  | 0.8999  | 0.4665  | 0.4092 | 0.7579 |
| <i>5758</i>                            | AGAP005758 | 100 | 2  | 2.3379  | 0.5497  | 0.4616 | 0.7745 |
| <i>5762</i>                            | AGAP005762 | 100 | 20 | 1.0203  | -0.4835 | 0.2026 | 0.2448 |
| <i>H603 flanking</i>                   | AGAP007058 | 100 | 16 | -1.469  | 0.3172  | 0.3162 | 0.425  |
| <i>LRR(7059)</i>                       | AGAP007059 | 100 | 9  | 1.6054  | -0.0451 | 0.3622 | 0.425  |
| <i>PRS1</i>                            | AGAP006102 | 100 | 14 | -1.6311 | 0.2602  | 0.3306 | 0.499  |
| <i>IRSP1</i>                           | AGAP006421 | 100 | 10 | -0.5248 | -1.9277 | 0.1946 | 0.425  |
| <i>TEP1</i>                            | AGAP010815 | 100 | 11 | 0.1881  | 0.0061  | 0.3224 | 0.7133 |
| <i>AgMDL2</i>                          | AGAP012352 | 100 | 48 | -0.423  | 0.6236  | 0.1192 | 0.7126 |
| <i>APOII-I</i>                         | AGAP001826 | 100 | 8  | 1.1057  | 0.6108  | 0.2666 | 0.7186 |
| <i>APOD</i>                            | AGAP002593 | 100 | 38 | -0.57   | 0.1383  | 0.0688 | 0.4118 |
| <i>WASP</i>                            | AGAP001081 | 100 | 13 | -0.8877 | 0.1567  | 0.392  | 0.4439 |
| <i>LRIM1</i>                           | AGAP006348 | 100 | 22 | 0.8458  | -0.2961 | 0.2756 | 0.2863 |
| <hr/>                                  |            |     |    |         |         |        |        |
| GOUNDRY                                |            |     |    |         |         |        |        |
| <i>2La<sup>a</sup>/2La<sup>a</sup></i> |            |     |    |         |         |        |        |
| <i>Toll9</i>                           | AGAP006974 | 40  | 59 | 0.7813  | -0.4603 | 0.0688 | 0.1255 |
| <i>LRR(7030)</i>                       | AGAP007030 | 34  | 22 | -1.3252 | -1.5011 | 0.1211 | 0.0482 |
| <i>APL1C</i>                           | AGAP007033 | 40  | 29 | -0.1794 | -0.6664 | 0.105  | 0.16   |
| <i>FBN32</i>                           | AGAP007041 | 100 | 15 | -1.2392 | -1.6624 | 0.508  | 0.0482 |
| <i>LRR(7048)</i>                       | AGAP007048 | 100 | 73 | -1.6192 | 0.4025  | 0.1242 | 0.4164 |
| <i>LRR(7060)</i>                       | AGAP007060 | 100 | 38 | -2.0531 | -2.2083 | 0.3992 | 0.028  |
| <i>DLL</i>                             | AGAP007058 | 100 | 72 | -2.3283 | -2.5965 | 0.2512 | 0.0252 |
| <i>GPRNNA21</i>                        | AGAP005681 | 40  | 9  | -0.0237 | -0.8588 | 0.3275 | 0.2329 |
| <i>APL2</i>                            | AGAP005693 | 40  | 17 | -1.4316 | -0.7944 | 0.345  | 0.1101 |
| <i>SCRB16</i>                          | AGAP005716 | 40  | 28 | 0.3575  | -0.8282 | 0.1475 | 0.1033 |
| <i>APL1B</i>                           | AGAP007035 | 100 | 70 | 0.2394  | -2.4022 | 0.2408 | 0.0252 |
| <i>APL1A</i>                           | AGAP007036 | 38  | 78 | 2.4679  | -0.2821 | 0.2853 | 0.5291 |
| <i>LRR(7037)</i>                       | AGAP007037 | 38  | 5  | 0.0936  | -0.2734 | 0.4765 | 0.16   |
| <i>LRR(7061)</i>                       | AGAP007061 | 40  | 19 | -0.8833 | -1.7333 | 0.2463 | 0.4164 |
| <i>7032</i>                            | AGAP007032 | 40  | 36 | -0.3302 | 0.3314  | 0.1038 | 0.3951 |
| <i>LRR(7034)</i>                       | AGAP007034 | 40  | 10 | 1.2186  | -1.045  | 0.4313 | 0.5291 |
| <i>5758</i>                            | AGAP005758 | 38  | 9  | 1.173   | 0.9511  | 0.2175 | 0.931  |
| <i>5762</i>                            | AGAP005762 | 38  | 25 | -0.1673 | 0.4451  | 0.1177 | 0.4444 |
| <i>H603 flanking</i>                   | AGAP007058 | 100 | 24 | -1.312  | -3.2452 | 0.1474 | 0.0994 |
| <i>LRR(7059)</i>                       | AGAP007059 | 100 | 44 | -0.924  | -0.8104 | 0.1418 | 0.1033 |
| <i>PRS1</i>                            | AGAP006102 | 40  | 8  | 0.5677  | -1.2126 | 0.2888 | 0.1255 |

|                |            |    |    |         |         |        |        |
|----------------|------------|----|----|---------|---------|--------|--------|
| <i>IRSP1</i>   | AGAP006421 | 40 | 34 | -1.2448 | -1.8962 | 0.22   | 0.1255 |
| <i>TEP1</i>    | AGAP010815 | 40 | 11 | 0.2615  | 0.3394  | 0.345  | 0.5291 |
| <i>AgMDL2</i>  | AGAP012352 | 40 | 44 | -0.7708 | 0.7287  | 0.185  | 0.6782 |
| <i>APOII-I</i> | AGAP001826 | 40 | 8  | 0.6999  | 0.5657  | 0.275  | 0.5291 |
| <i>APOD</i>    | AGAP002593 | 40 | 38 | -1.0434 | 0.0154  | 0.08   | 0.2317 |
| <i>WASP</i>    | AGAP001081 | 38 | 16 | -1.3667 | 0.3246  | 0.3213 | 0.4164 |
| <i>LRIM1</i>   | AGAP006348 | 38 | 17 | 2.1208  | 0.2522  | 0.3269 | 0.3668 |

a- Number of chromosomes in the sample. Loci with  $n=100$  had more than 100 in the original sample, but were down-sampled to 100 for this analysis.

b- Number of synonymous segregating sites.

c- Tajima's  $D$  calculated using only synonymous sites.

d- Normalized Fay and Wu's  $H$  calculated using only synonymous sites.

e- Ewens-Watterson's haplotype homozygosity statistic calculated using only synonymous sites.

f-  $HEW$   $p$ -value with Benjamini and Hochberg correction for multiple tests.

Statistical significance of  $HEW$  was evaluated by comparison to  $10^5$  neutral coalescent simulations of each sample (see Methods).



**Table S5 Results from *post-hoc* evaluation of haploype reconstruction for genes with significant *HEW* result.**

| Gene                               | Confidence Rank <sup>a</sup> | Mean Probability (<1) <sup>b</sup> | Proportion Imputed Rank <sup>c</sup> | Proportion Phased Rank <sup>d</sup> |
|------------------------------------|------------------------------|------------------------------------|--------------------------------------|-------------------------------------|
| M form                             |                              |                                    |                                      |                                     |
| <i>LRIM1</i>                       | 50                           | 0.82                               | 55                                   | 26                                  |
| <i>TEP1</i>                        | 20                           | 0.76                               | 90                                   | 100                                 |
| <i>APL1A</i>                       | 86                           | 0.74                               | 33                                   | 12                                  |
| <i>APL1B</i>                       | 76                           | 0.81                               | 36                                   | 19                                  |
| <i>LRR (7059)</i>                  | 40                           | 0.78                               | 70                                   | 72                                  |
| <i>IRSP1</i>                       | 24                           | 0.73                               | 35                                   | 32                                  |
| GOUNDRY                            |                              |                                    |                                      |                                     |
| 2La <sup>a</sup> /2La <sup>a</sup> |                              |                                    |                                      |                                     |
| <i>DLL</i>                         | 53                           | 0.73                               | 27                                   | 70                                  |
| <i>APL1B</i>                       | 94                           | 0.86                               | 39                                   | 7                                   |
| <i>LRR (7030)</i>                  | 2                            | 0.78                               | 24                                   | 58                                  |
| <i>LRR (7060)</i>                  | 64                           | 0.76                               | 37                                   | 83                                  |
| <i>FBN32</i>                       | 74                           | 0.77                               | 62                                   | 88                                  |
| GOUNDRY                            |                              |                                    |                                      |                                     |
| 2La <sup>+</sup> /2La <sup>+</sup> |                              |                                    |                                      |                                     |
| <i>TOLL9</i>                       | 63                           | 0.78                               | 29                                   | 24                                  |

Haplotype reconstruction and imputation was conducted for each gene in each population separately. For GOUNDRY, genes inside the 2La inversion were treated separately according to 2La homokaryotype, while genes outside of the inversion were treated as one group. In total, this resulted in 102 runs of the program PHASE (Stephens, Smith, and Donnelly 2001). When a heterozygous site is phased, it is given a statistical confidence probability ranging from 0.5 to 1, where 0.5 is low confidence or complete ambiguity and 1 being the highest level of confidence.

<sup>a</sup> Genes ranked based on the proportion of phased sites that were given a confidence probability less than 1, with 1 indicating the gene with the most

<sup>b</sup> Mean probability calculated for each gene for sites with probabilities less than 1.

<sup>c</sup> Genes ranked based on the proportion of sequenced sites that were imputed, with 1 representing gene with the most imputed sites.

<sup>d</sup> Genes ranked based on the proportion of sequenced sites that were phased, with 1 representing the gene with the most statistically phased sites.
