# Supplementary material for: Evidence for Population-Specific Positive Selection on Immune Genes of Anopheles gambiae
Source: PubMed Central journal article supplement (PMC3516473; doi:10.1534/g3.112.004473), 2012-12-01
Supplement: supp_2.12.1505_TableS2.pdf [file supp_2.12.1505_TableS2.pdf]

**Table S2 Fragment and PCR Oligo information.**

| Identifier | Gene      | PCR      |                             | Reverse oligo                | Fragment |              |
|------------|-----------|----------|-----------------------------|------------------------------|----------|--------------|
|            |           | fragment | Forward oligo               |                              | Length   | Year Sampled |
| AGAP005681 | GPRNNA21  | AmS010b  | 5'-GCATCATCATCGGTCACCG-3'   | 5'-CTGAGTCACCTGCAAACCG-3'    | 528      | 2007         |
| AGAP005693 | APL2      | AmS011b  | 5'-CTATCCACCGTCCAGTTTG-3'   | 5'-GGTTCGGTGGAAATTCTAACC-3'  | 561      | 2007         |
| AGAP005716 | SCRB16    | AmS013a  | 5'-TGCCGAAGATGAAACGTACG-3'  | 5'-CGTGCTAAAGATTGTCATCCG-3'  | 534      | 2007         |
| AGAP005728 | 5728      | AmS048b  | 5'-GAATTGCGCAAACAGTCCAG-3'  | 5'-CACGTTGCATATCTCGCTGA-3'   | 650      | 2007         |
| AGAP005762 | 5762      | AmS049b  | 5'-ATCGATGTCCTCGGCACTAC-3'  | 5'-GATGGTCAAAGCCAACGAAC-3'   | 525      | 2007         |
| AGAP006102 | PRS1      | AmS052b  | 5'-CGAAAGTGATTCCGGACAAG-3'  | 5'-TTATCGCTCGCACAGCAC-3'     | 304      | 2007         |
| AGAP006348 | LRIM1     | AmS059e  | 5'-CCTCGTACCGCTTGACGAT-3'   | 5'-GTGACCTGGATCAGTCTGC-3'    | 576      | 2007         |
| AGAP006421 | IRSP1     | AmS053a  | 5'-ATGGCCATCTGGATAGCTTG-3'  | 5'-GATATTCGCTCCACCAGCTC-3'   | 563      | 2007         |
| AGAP006974 | TOLL9     | AmS001b  | 5'-GCATCTCGAACTGACACCAG-3'  | 5'-TTCGGATATTCCGGAGGAG-3'    | 536      | 2007         |
| AGAP007030 | LRR(7030) | AmS002a  | 5'-AGAAACAACAGTCGCAAGCTC-3' | 5'-ACATGCTGTGCACCATAAAGAA-3' | 501      | 2007         |
| AGAP007032 | 7032      | AmS046a  | 5'-CGAAAGCAGCAGAAGAATCG-3'  | 5'-TGCTGCATCGTTGTGCACG-3'    | 601      | 2007         |
| AGAP007033 | APL1C     | AmS003a  | 5'-CTTCTGAATAGTGTGCGGTAA-3' | 5'-TGAGACAAACTTTGGAGGTCAG-3' | 371      | 2007         |
| AGAP007034 | LRR(7034) | AmS047b  | 5'-CACAGATGCTCCAGCTTCG-3'   | 5'-CGTACTTGGTGGACCAACG-3'    | 738      | 2007         |
| AGAP007035 | APL1B     | AmS036a  | 5'-AGATGGGTCTGTGTTTGCTG-3'  | 5'-CGCACACCATTGATGTGGG-3'    | 833      | 2007-2008    |
| AGAP007036 | APL1A     | AmS037d  | 5'-TGTGATTTAYMCAACTCATGC-3' | 5'-TCAAAGTGCTCGATYTGTCG-3'   | 802      | 2007         |
| AGAP007037 | LRR(7037) | AmS038a  | 5'-CGTTGTCCAGTATCCACAG-3'   | 5'-CAACAACACGATCAAGCAGC-3'   | 580      | 2007         |
| AGAP007041 | FBN32     | AmS004b  | 5'-GTACGATGGTACGGTCGATTC-3' | 5'-GGTAGGAATGCTTCCGATTAG-3'  | 486      | 2007-2008    |

Table S2: Continued

| Identifier | Gene              | PCR      |                             | Reverse oligo                | Fragment Length | Year Sampled |
|------------|-------------------|----------|-----------------------------|------------------------------|-----------------|--------------|
|            |                   | fragment | Forward oligo               |                              |                 |              |
| AGAP007048 | LRR(7048)         | AmS005b  | 5'-TTTTTAAGCCTAGCCCGTCTG-3' | 5'-CAGCTCGGTAAGCCGATTG-3'    | 491             | 2007-2008    |
| AGAP007058 | DLL               | AmS007b  | 5'-GTACGTAGCCACCCATCTG-3'   | 5'-GTTAAGATCTGGTTTCAAATCG-3' | 641             | 2007-2008    |
| AGAP007059 | LRR(7059)         | AmS051b  | 5'-ACCAGGCGCTAGTTCTTTGA-3'  | 5'-TACCGCAACGGTCTTTAAC-3'    | 641             | 2007-2008    |
| AGAP007060 | LRR(7060)         | AmS006b  | 5'-AGTAGCAGGCTCGTGAGTGAG-3' | 5'-GAAGCACTTCCACTGGTGCT-3'   | 658             | 2007-2008    |
| AGAP007061 | LRR(7061)         | AmS045b  | 5'-AGGAAAGATCAAGCAGCTCG-3'  | 5'-CTGGCGATCGTCAACAACG-3'    | 532             | 2007         |
| H603flank  | intergenic region | AmS050a  | 5'-CAAGGCAGCTTCTTCGTTCT-3'  | 5'-GTTACAGAGTTTGGTCTTGC-3'   | 522             | 2007-2008    |
| AGAP001826 | APOII/I           | AmS056a  | 5'-CCGTTGACGTGGTACTTGG-3'   | 5'-ATGTGGCTGCCGATTTCTAC-3'   | 566             | 2007         |
| AGAP002593 | APOD              | AmS057c  | 5'-GGTACGATCAACACTTCGAG-3'  | 5'-TGATGCGCATATCCTGTCG-3'    | 490             | 2007         |
| AGAP010815 | TEP1              | AmS054c  | 5'-CGTATTTGGACGTCCGACG-3'   | 5'-CCATGCAATCAATGAGAACG-3'   | 579             | 2007         |
| AGAP012352 | AgMDL1            | AmS055b  | 5'-CAGCAGGATTCAGTTCTC-3'    | 5'-ATCCATGAGGTTTCGATCTC-3'   | 486             | 2007         |
| AGAP001081 | WASP              | AmS058b  | 5'-TTCGTCTCGGTAGCAAAG-3'    | 5'-TGGTGCAGCTGTACACGAC-3'    | 440             | 2007         |
