# Supplementary material for: Evidence for Population-Specific Positive Selection on Immune Genes of Anopheles gambiae
Source: PubMed Central journal article supplement (PMC3516473; doi:10.1534/g3.112.004473), 2012-12-01
Supplement: supp_2.12.1505_TableS3.pdf [file supp_2.12.1505_TableS3.pdf]

**Table S3** Sequenced fragment physical genomic locations

| Identifier | Gene Name  | Chromosome | Chromosomal           |             | Chromosomal Strand |
|------------|------------|------------|-----------------------|-------------|--------------------|
|            |            |            | Location <sup>a</sup> | Inside PRI? |                    |
| AGAP005681 | GPRNNA21   | 2L         | 18693376              | Yes         | -                  |
| AGAP005693 | APL2       | 2L         | 18785249              | Yes         | +                  |
| AGAP005716 | SCRB16     | 2L         | 19542880              | Yes         | +                  |
| AGAP005728 | 5728       | 2L         | 19769635              | Yes         | -                  |
| AGAP005762 | 5762       | 2L         | 20339460              | Yes         | -                  |
| AGAP006102 | PRS1       | 2L         | 26685850              | No          | +                  |
| AGAP006348 | LRIM1      | 2L         | 30329656              | No          | -                  |
| AGAP006421 | IRSP1      | 2L         | 31693742              | No          | +                  |
| AGAP006974 | TOLL9      | 2L         | 40434581              | Yes         | -                  |
| AGAP007030 | LRR(7030)  | 2L         | 41057548              | Yes         | -                  |
| AGAP007032 | 7032       | 2L         | 41245076              | Yes         | +                  |
| AGAP007033 | APL1C      | 2L         | 41257877              | Yes         | -                  |
| AGAP007034 | LRR(7034)  | 2L         | 41262272              | Yes         | -                  |
| AGAP007035 | APL1B      | 2L         | 41266619              | Yes         | -                  |
| AGAP007036 | APL1A      | 2L         | 41271509              | Yes         | -                  |
| AGAP007037 | LRR(7037)  | 2L         | 41274607              | Yes         | -                  |
| AGAP007041 | FBN32      | 2L         | 41381834              | Yes         | +                  |
| AGAP007048 | LRR(7048)  | 2L         | 41648960              | Yes         | +                  |
| AGAP007058 | Distalless | 2L         | 42005592              | Yes         | -                  |
| AGAP007059 | LRR(7059)  | 2L         | 42005592              | Yes         | +                  |
| AGAP007060 | LRR(7060)  | 2L         | 42062331              | Yes         | -                  |
| AGAP007061 | LRR(7061)  | 2L         | 42067616              | Yes         | -                  |
|            | intergenic |            |                       |             |                    |
| H603flank  | region     | 2L         | 42071847              | Yes         | -                  |
| AGAP001826 | APOII/I    | 2R         | 11201968              | No          | -                  |
| AGAP002593 | APOD       | 2R         | 40909880              | No          | -                  |
| AGAP010815 | TEP1       | 3L         | 11117128              | No          | -                  |
| AGAP012352 | AgMDL1     | 3L         | 23677600              | No          | +                  |
| AGAP001081 | WASP       | X          | 23372448              | No          | -                  |

<sup>a</sup> Gene starting positions on chromosome 2 given according to locations in *A. gambiae* PEST genome sequence, which corresponds to the inverted 2La+ form of the 2La inversion.
