# Supplementary material for: Evidence for Population-Specific Positive Selection on Immune Genes of Anopheles gambiae
Source: PubMed Central journal article supplement (PMC3516473; doi:10.1534/g3.112.004473), 2012-12-01
Supplement: supp_2.12.1505_TableS4.pdf [file supp_2.12.1505_TableS4.pdf]

**Table S4 Population genetic summary statistics for all genes in each population.**

| Locus                | Identifier | n <sup>a</sup> | S <sub>syn</sub> <sup>b</sup> | D <sup>c</sup> | H <sup>d</sup> | EW <sup>e</sup> | HEW <sup>f</sup> |
|----------------------|------------|----------------|-------------------------------|----------------|----------------|-----------------|------------------|
| M form               |            |                |                               |                |                |                 |                  |
| <i>Toll9</i>         | AGAP006974 | 64             | 79                            | -0.6612        | -0.3681        | 0.019           | 1                |
| <i>LRR(7030)</i>     | AGAP007030 | 64             | 34                            | -0.7755        | -0.8827        | 0.062           | 0.0921           |
| <i>APL1C</i>         | AGAP007033 | 64             | 21                            | -0.546         | -1.1648        | 0.2739          | 0.084            |
| <i>FBN32</i>         | AGAP007041 | 100            | 33                            | -1.0852        | -0.7677        | 0.0864          | 0.0992           |
| <i>LRR(7048)</i>     | AGAP007048 | 100            | 68                            | -2.0115        | -0.1663        | 0.046           | 0.1441           |
| <i>LRR(7060)</i>     | AGAP007060 | 100            | 42                            | -1.6659        | 0.084          | 0.0842          | 0.2152           |
| <i>DLL</i>           | AGAP007058 | 100            | 87                            | -2.0234        | -0.6157        | 0.0208          | 0.1036           |
| <i>GPRNNA21</i>      | AGAP005681 | 64             | 16                            | -0.7143        | 0.1597         | 0.1201          | 0.2411           |
| <i>APL2</i>          | AGAP005693 | 64             | 27                            | -1.0359        | 0.6826         | 0.0459          | 0.7155           |
| <i>SCRB16</i>        | AGAP005716 | 64             | 47                            | -0.3479        | -0.3037        | 0.0347          | 0.1326           |
| <i>APL1B</i>         | AGAP007035 | 100            | 88                            | -0.5362        | -1.7003        | 0.0898          | 0.0294           |
| <i>APL1A</i>         | AGAP007036 | 62             | 110                           | -1.15          | -2.5176        | 0.3002          | 0.014            |
| <i>LRR(7037)</i>     | AGAP007037 | 64             | 13                            | -1.682         | -0.2348        | 0.5239          | 0.1441           |
| <i>LRR(7061)</i>     | AGAP007061 | 64             | 37                            | -0.8415        | 0.1359         | 0.0605          | 0.2283           |
| <i>7032</i>          | AGAP007032 | 64             | 73                            | -1.4061        | 0.5115         | 0.0181          | 1                |
| <i>LRR(7034)</i>     | AGAP007034 | 62             | 20                            | 0.174          | 0.7383         | 0.1623          | 0.779            |
| <i>5758</i>          | AGAP005758 | 64             | 29                            | -1.5625        | -0.1749        | 0.0815          | 0.1441           |
| <i>5762</i>          | AGAP005762 | 64             | 73                            | -1.6686        | -0.2999        | 0.02            | 0.1326           |
| <i>H603 flanking</i> | AGAP007058 | 100            | 54                            | -1.866         | -0.4372        | 0.023           | 0.1326           |
| <i>LRR(7059)</i>     | AGAP007059 | 100            | 50                            | -1.8131        | -1.6246        | 0.148           | 0.0302           |
| <i>PRS1</i>          | AGAP006102 | 64             | 16                            | -1.6028        | -0.1924        | 0.1709          | 0.1441           |
| <i>IRSP1</i>         | AGAP006421 | 64             | 55                            | -1.4194        | -2.4365        | 0.0557          | 0.014            |
| <i>TEP1</i>          | AGAP010815 | 64             | 10                            | -2.1817        | -2.0996        | 0.7979          | 0.0233           |
| <i>AgMDL2</i>        | AGAP012352 | 64             | 66                            | -1.7729        | 0.0863         | 0.0249          | 0.2667           |
| <i>APOII-I</i>       | AGAP001826 | 64             | 23                            | -1.5496        | -0.2477        | 0.1338          | 0.1441           |
| <i>APOD</i>          | AGAP002593 | 64             | 37                            | -0.8402        | -0.9231        | 0.0454          | 0.4199           |
| <i>WASP</i>          | AGAP001081 | 64             | 42                            | -1.6375        | -0.3393        | 0.0322          | 0.1326           |
| <i>LRIM1</i>         | AGAP006348 | 64             | 25                            | -0.1096        | -2.4951        | 0.1221          | 0.0336           |
| S form               |            |                |                               |                |                |                 |                  |
| <i>Toll9</i>         | AGAP006974 | 100            | 81                            | -0.6536        | -0.4918        | 0.0118          | 0.1352           |
| <i>LRR(7030)</i>     | AGAP007030 | 100            | 59                            | -1.1477        | -1.1961        | 0.0378          | 0.091            |
| <i>APL1C</i>         | AGAP007033 | 100            | 72                            | -1.3893        | -0.885         | 0.126           | 0.0928           |
| <i>FBN32</i>         | AGAP007041 | 100            | 47                            | -1.7597        | -0.7475        | 0.0454          | 0.1117           |
| <i>LRR(7048)</i>     | AGAP007048 | 100            | 79                            | -2.2608        | -0.1704        | 0.0364          | 0.1473           |

|                      |            |     |     |         |         |        |        |
|----------------------|------------|-----|-----|---------|---------|--------|--------|
| <i>LRR(7060)</i>     | AGAP007060 | 100 | 50  | -2.0471 | -1.4173 | 0.0684 | 0.091  |
| <i>DLL</i>           | AGAP007058 | 100 | 96  | -1.9502 | -1.2775 | 0.0146 | 0.091  |
| <i>GPRNNA21</i>      | AGAP005681 | 100 | 28  | -1.7265 | -0.4675 | 0.1156 | 0.1473 |
| <i>APL2</i>          | AGAP005693 | 100 | 43  | -1.7926 | 0.4499  | 0.0434 | 0.3721 |
| <i>SCRB16</i>        | AGAP005716 | 100 | 58  | -0.7949 | -0.4554 | 0.026  | 0.1352 |
| <i>APL1B</i>         | AGAP007035 | 100 | 120 | -0.7912 | -1.5837 | 0.0172 | 0.091  |
| <i>APL1A</i>         | AGAP007036 | 100 | 147 | -0.061  | -1.4618 | 0.0158 | 0.1352 |
| <i>LRR(7037)</i>     | AGAP007037 | 100 | 49  | -2.0094 | -0.0114 | 0.0688 | 0.1535 |
| <i>LRR(7061)</i>     | AGAP007061 | 100 | 33  | -0.9212 | -0.1171 | 0.0894 | 0.1473 |
| <i>7032</i>          | AGAP007032 | 100 | 83  | -1.7822 | 0.2356  | 0.0154 | 0.2135 |
| <i>LRR(7034)</i>     | AGAP007034 | 100 | 42  | -1.9241 | -0.099  | 0.0598 | 0.1473 |
| <i>5758</i>          | AGAP005758 | 100 | 37  | -1.7718 | -0.1192 | 0.0642 | 0.1473 |
| <i>5762</i>          | AGAP005762 | 100 | 100 | -1.564  | 0.0407  | 0.0122 | 0.1535 |
| <i>H603 flanking</i> | AGAP007058 | 100 | 83  | -2.2543 | -0.1461 | 0.0202 | 0.1473 |
| <i>LRR(7059)</i>     | AGAP007059 | 100 | 51  | -0.986  | -0.2439 | 0.042  | 0.1473 |
| <i>PRS1</i>          | AGAP006102 | 100 | 17  | -1.4331 | -0.2205 | 0.1842 | 0.1473 |
| <i>IRSP1</i>         | AGAP006421 | 100 | 61  | -0.8321 | -0.9617 | 0.017  | 0.0928 |
| <i>TEP1</i>          | AGAP010815 | 100 | 15  | 0.317   | 0.565   | 0.2096 | 0.5221 |
| <i>AgMDL2</i>        | AGAP012352 | 100 | 68  | -1.4512 | 0.4507  | 0.0198 | 0.3682 |
| <i>APOII-I</i>       | AGAP001826 | 100 | 44  | -2.0695 | 0.1091  | 0.0598 | 0.1926 |
| <i>APOD</i>          | AGAP002593 | 100 | 53  | -1.819  | -0.9022 | 0.065  | 0.0928 |
| <i>WASP</i>          | AGAP001081 | 100 | 77  | -2.2284 | -0.1177 | 0.0432 | 0.1473 |
| <i>LRIM1</i>         | AGAP006348 | 100 | 47  | -0.5435 | -0.0234 | 0.0228 | 0.1535 |

---

GOUNDRY

$2\text{La}^+/2\text{La}^+$

|                  |            |     |    |         |         |        |        |
|------------------|------------|-----|----|---------|---------|--------|--------|
| <i>ToII9</i>     | AGAP006974 | 100 | 50 | -0.1716 | -3.0625 | 0.0868 | 0.0224 |
| <i>LRR(7030)</i> | AGAP007030 | 100 | 23 | -0.1144 | 0.5018  | 0.059  | 0.5892 |
| <i>APL1C</i>     | AGAP007033 | 100 | 22 | -0.1767 | -1.6356 | 0.2556 | 0.0999 |
| <i>FBN32</i>     | AGAP007041 | 100 | 23 | 0.2029  | 0.3183  | 0.2676 | 0.425  |
| <i>LRR(7048)</i> | AGAP007048 | 100 | 14 | 1.5159  | -0.1189 | 0.1616 | 0.3041 |
| <i>LRR(7060)</i> | AGAP007060 | 100 | 10 | 0.0003  | -0.5047 | 0.3704 | 0.425  |
| <i>DLL</i>       | AGAP007058 | 100 | 16 | 0.9977  | -0.2242 | 0.211  | 0.3027 |
| <i>GPRNNA21</i>  | AGAP005681 | 100 | 11 | -0.4812 | 0.0792  | 0.365  | 0.3683 |
| <i>APL2</i>      | AGAP005693 | 100 | 13 | -1.0815 | -0.5745 | 0.3712 | 0.2448 |
| <i>SCRB16</i>    | AGAP005716 | 100 | 21 | 1.0104  | -1.0902 | 0.1456 | 0.2402 |
| <i>APL1B</i>     | AGAP007035 | 100 | 70 | 0.7992  | -2.3727 | 0.336  | 0.0999 |
| <i>APL1A</i>     | AGAP007036 | 100 | 63 | 2.4401  | -1.8712 | 0.1678 | 0.7745 |
| <i>LRR(7037)</i> | AGAP007037 | 100 | 8  | 0.3655  | 0.6926  | 0.2866 | 0.7745 |

---

|                                        |            |     |    |         |         |        |        |
|----------------------------------------|------------|-----|----|---------|---------|--------|--------|
| <i>LRR(7061)</i>                       | AGAP007061 | 100 | 8  | 2.4058  | 0.072   | 0.418  | 0.425  |
| <i>7032</i>                            | AGAP007032 | 100 | 19 | 1.1648  | -3.0339 | 0.328  | 0.2402 |
| <i>LRR(7034)</i>                       | AGAP007034 | 100 | 6  | 0.8999  | 0.4665  | 0.4092 | 0.7579 |
| <i>5758</i>                            | AGAP005758 | 100 | 2  | 2.3379  | 0.5497  | 0.4616 | 0.7745 |
| <i>5762</i>                            | AGAP005762 | 100 | 20 | 1.0203  | -0.4835 | 0.2026 | 0.2448 |
| <i>H603 flanking</i>                   | AGAP007058 | 100 | 16 | -1.469  | 0.3172  | 0.3162 | 0.425  |
| <i>LRR(7059)</i>                       | AGAP007059 | 100 | 9  | 1.6054  | -0.0451 | 0.3622 | 0.425  |
| <i>PRS1</i>                            | AGAP006102 | 100 | 14 | -1.6311 | 0.2602  | 0.3306 | 0.499  |
| <i>IRSP1</i>                           | AGAP006421 | 100 | 10 | -0.5248 | -1.9277 | 0.1946 | 0.425  |
| <i>TEP1</i>                            | AGAP010815 | 100 | 11 | 0.1881  | 0.0061  | 0.3224 | 0.7133 |
| <i>AgMDL2</i>                          | AGAP012352 | 100 | 48 | -0.423  | 0.6236  | 0.1192 | 0.7126 |
| <i>APOII-I</i>                         | AGAP001826 | 100 | 8  | 1.1057  | 0.6108  | 0.2666 | 0.7186 |
| <i>APOD</i>                            | AGAP002593 | 100 | 38 | -0.57   | 0.1383  | 0.0688 | 0.4118 |
| <i>WASP</i>                            | AGAP001081 | 100 | 13 | -0.8877 | 0.1567  | 0.392  | 0.4439 |
| <i>LRIM1</i>                           | AGAP006348 | 100 | 22 | 0.8458  | -0.2961 | 0.2756 | 0.2863 |
| <hr/>                                  |            |     |    |         |         |        |        |
| GOUNDRY                                |            |     |    |         |         |        |        |
| <i>2La<sup>a</sup>/2La<sup>a</sup></i> |            |     |    |         |         |        |        |
| <i>Toll9</i>                           | AGAP006974 | 40  | 59 | 0.7813  | -0.4603 | 0.0688 | 0.1255 |
| <i>LRR(7030)</i>                       | AGAP007030 | 34  | 22 | -1.3252 | -1.5011 | 0.1211 | 0.0482 |
| <i>APL1C</i>                           | AGAP007033 | 40  | 29 | -0.1794 | -0.6664 | 0.105  | 0.16   |
| <i>FBN32</i>                           | AGAP007041 | 100 | 15 | -1.2392 | -1.6624 | 0.508  | 0.0482 |
| <i>LRR(7048)</i>                       | AGAP007048 | 100 | 73 | -1.6192 | 0.4025  | 0.1242 | 0.4164 |
| <i>LRR(7060)</i>                       | AGAP007060 | 100 | 38 | -2.0531 | -2.2083 | 0.3992 | 0.028  |
| <i>DLL</i>                             | AGAP007058 | 100 | 72 | -2.3283 | -2.5965 | 0.2512 | 0.0252 |
| <i>GPRNNA21</i>                        | AGAP005681 | 40  | 9  | -0.0237 | -0.8588 | 0.3275 | 0.2329 |
| <i>APL2</i>                            | AGAP005693 | 40  | 17 | -1.4316 | -0.7944 | 0.345  | 0.1101 |
| <i>SCRB16</i>                          | AGAP005716 | 40  | 28 | 0.3575  | -0.8282 | 0.1475 | 0.1033 |
| <i>APL1B</i>                           | AGAP007035 | 100 | 70 | 0.2394  | -2.4022 | 0.2408 | 0.0252 |
| <i>APL1A</i>                           | AGAP007036 | 38  | 78 | 2.4679  | -0.2821 | 0.2853 | 0.5291 |
| <i>LRR(7037)</i>                       | AGAP007037 | 38  | 5  | 0.0936  | -0.2734 | 0.4765 | 0.16   |
| <i>LRR(7061)</i>                       | AGAP007061 | 40  | 19 | -0.8833 | -1.7333 | 0.2463 | 0.4164 |
| <i>7032</i>                            | AGAP007032 | 40  | 36 | -0.3302 | 0.3314  | 0.1038 | 0.3951 |
| <i>LRR(7034)</i>                       | AGAP007034 | 40  | 10 | 1.2186  | -1.045  | 0.4313 | 0.5291 |
| <i>5758</i>                            | AGAP005758 | 38  | 9  | 1.173   | 0.9511  | 0.2175 | 0.931  |
| <i>5762</i>                            | AGAP005762 | 38  | 25 | -0.1673 | 0.4451  | 0.1177 | 0.4444 |
| <i>H603 flanking</i>                   | AGAP007058 | 100 | 24 | -1.312  | -3.2452 | 0.1474 | 0.0994 |
| <i>LRR(7059)</i>                       | AGAP007059 | 100 | 44 | -0.924  | -0.8104 | 0.1418 | 0.1033 |
| <i>PRS1</i>                            | AGAP006102 | 40  | 8  | 0.5677  | -1.2126 | 0.2888 | 0.1255 |

|                |            |    |    |         |         |        |        |
|----------------|------------|----|----|---------|---------|--------|--------|
| <i>IRSP1</i>   | AGAP006421 | 40 | 34 | -1.2448 | -1.8962 | 0.22   | 0.1255 |
| <i>TEP1</i>    | AGAP010815 | 40 | 11 | 0.2615  | 0.3394  | 0.345  | 0.5291 |
| <i>AgMDL2</i>  | AGAP012352 | 40 | 44 | -0.7708 | 0.7287  | 0.185  | 0.6782 |
| <i>APOII-I</i> | AGAP001826 | 40 | 8  | 0.6999  | 0.5657  | 0.275  | 0.5291 |
| <i>APOD</i>    | AGAP002593 | 40 | 38 | -1.0434 | 0.0154  | 0.08   | 0.2317 |
| <i>WASP</i>    | AGAP001081 | 38 | 16 | -1.3667 | 0.3246  | 0.3213 | 0.4164 |
| <i>LRIM1</i>   | AGAP006348 | 38 | 17 | 2.1208  | 0.2522  | 0.3269 | 0.3668 |

a- Number of chromosomes in the sample. Loci with  $n=100$  had more than 100 in the original sample, but were down-sampled to 100 for this analysis.

b- Number of synonymous segregating sites.

c- Tajima's  $D$  calculated using only synonymous sites.

d- Normalized Fay and Wu's  $H$  calculated using only synonymous sites.

e- Ewens-Watterson's haplotype homozygosity statistic calculated using only synonymous sites.

f-  $HEW$   $p$ -value with Benjamini and Hochberg correction for multiple tests.

Statistical significance of  $HEW$  was evaluated by comparison to  $10^5$  neutral coalescent simulations of each sample (see Methods).
